# Supplementary material for: Comparative genomics reveals electron transfer and syntrophic mechanisms differentiating methanotrophic and methanogenic archaea
Source: PLOS journal article supplement (doi:10.1371/journal.pbio.3001508), 2022-01-05
Supplement: S6 (10.1371/journal.pbio.3001508.s006) [file journal.pbio.3001508.s006.ai]

[illegible]
