# Supplementary figures and images for: Comparative genomics reveals electron transfer and syntrophic mechanisms differentiating methanotrophic and methanogenic archaea
Source: PLOS journal article supplement (doi:10.1371/journal.pbio.3001508), 2022-01-05

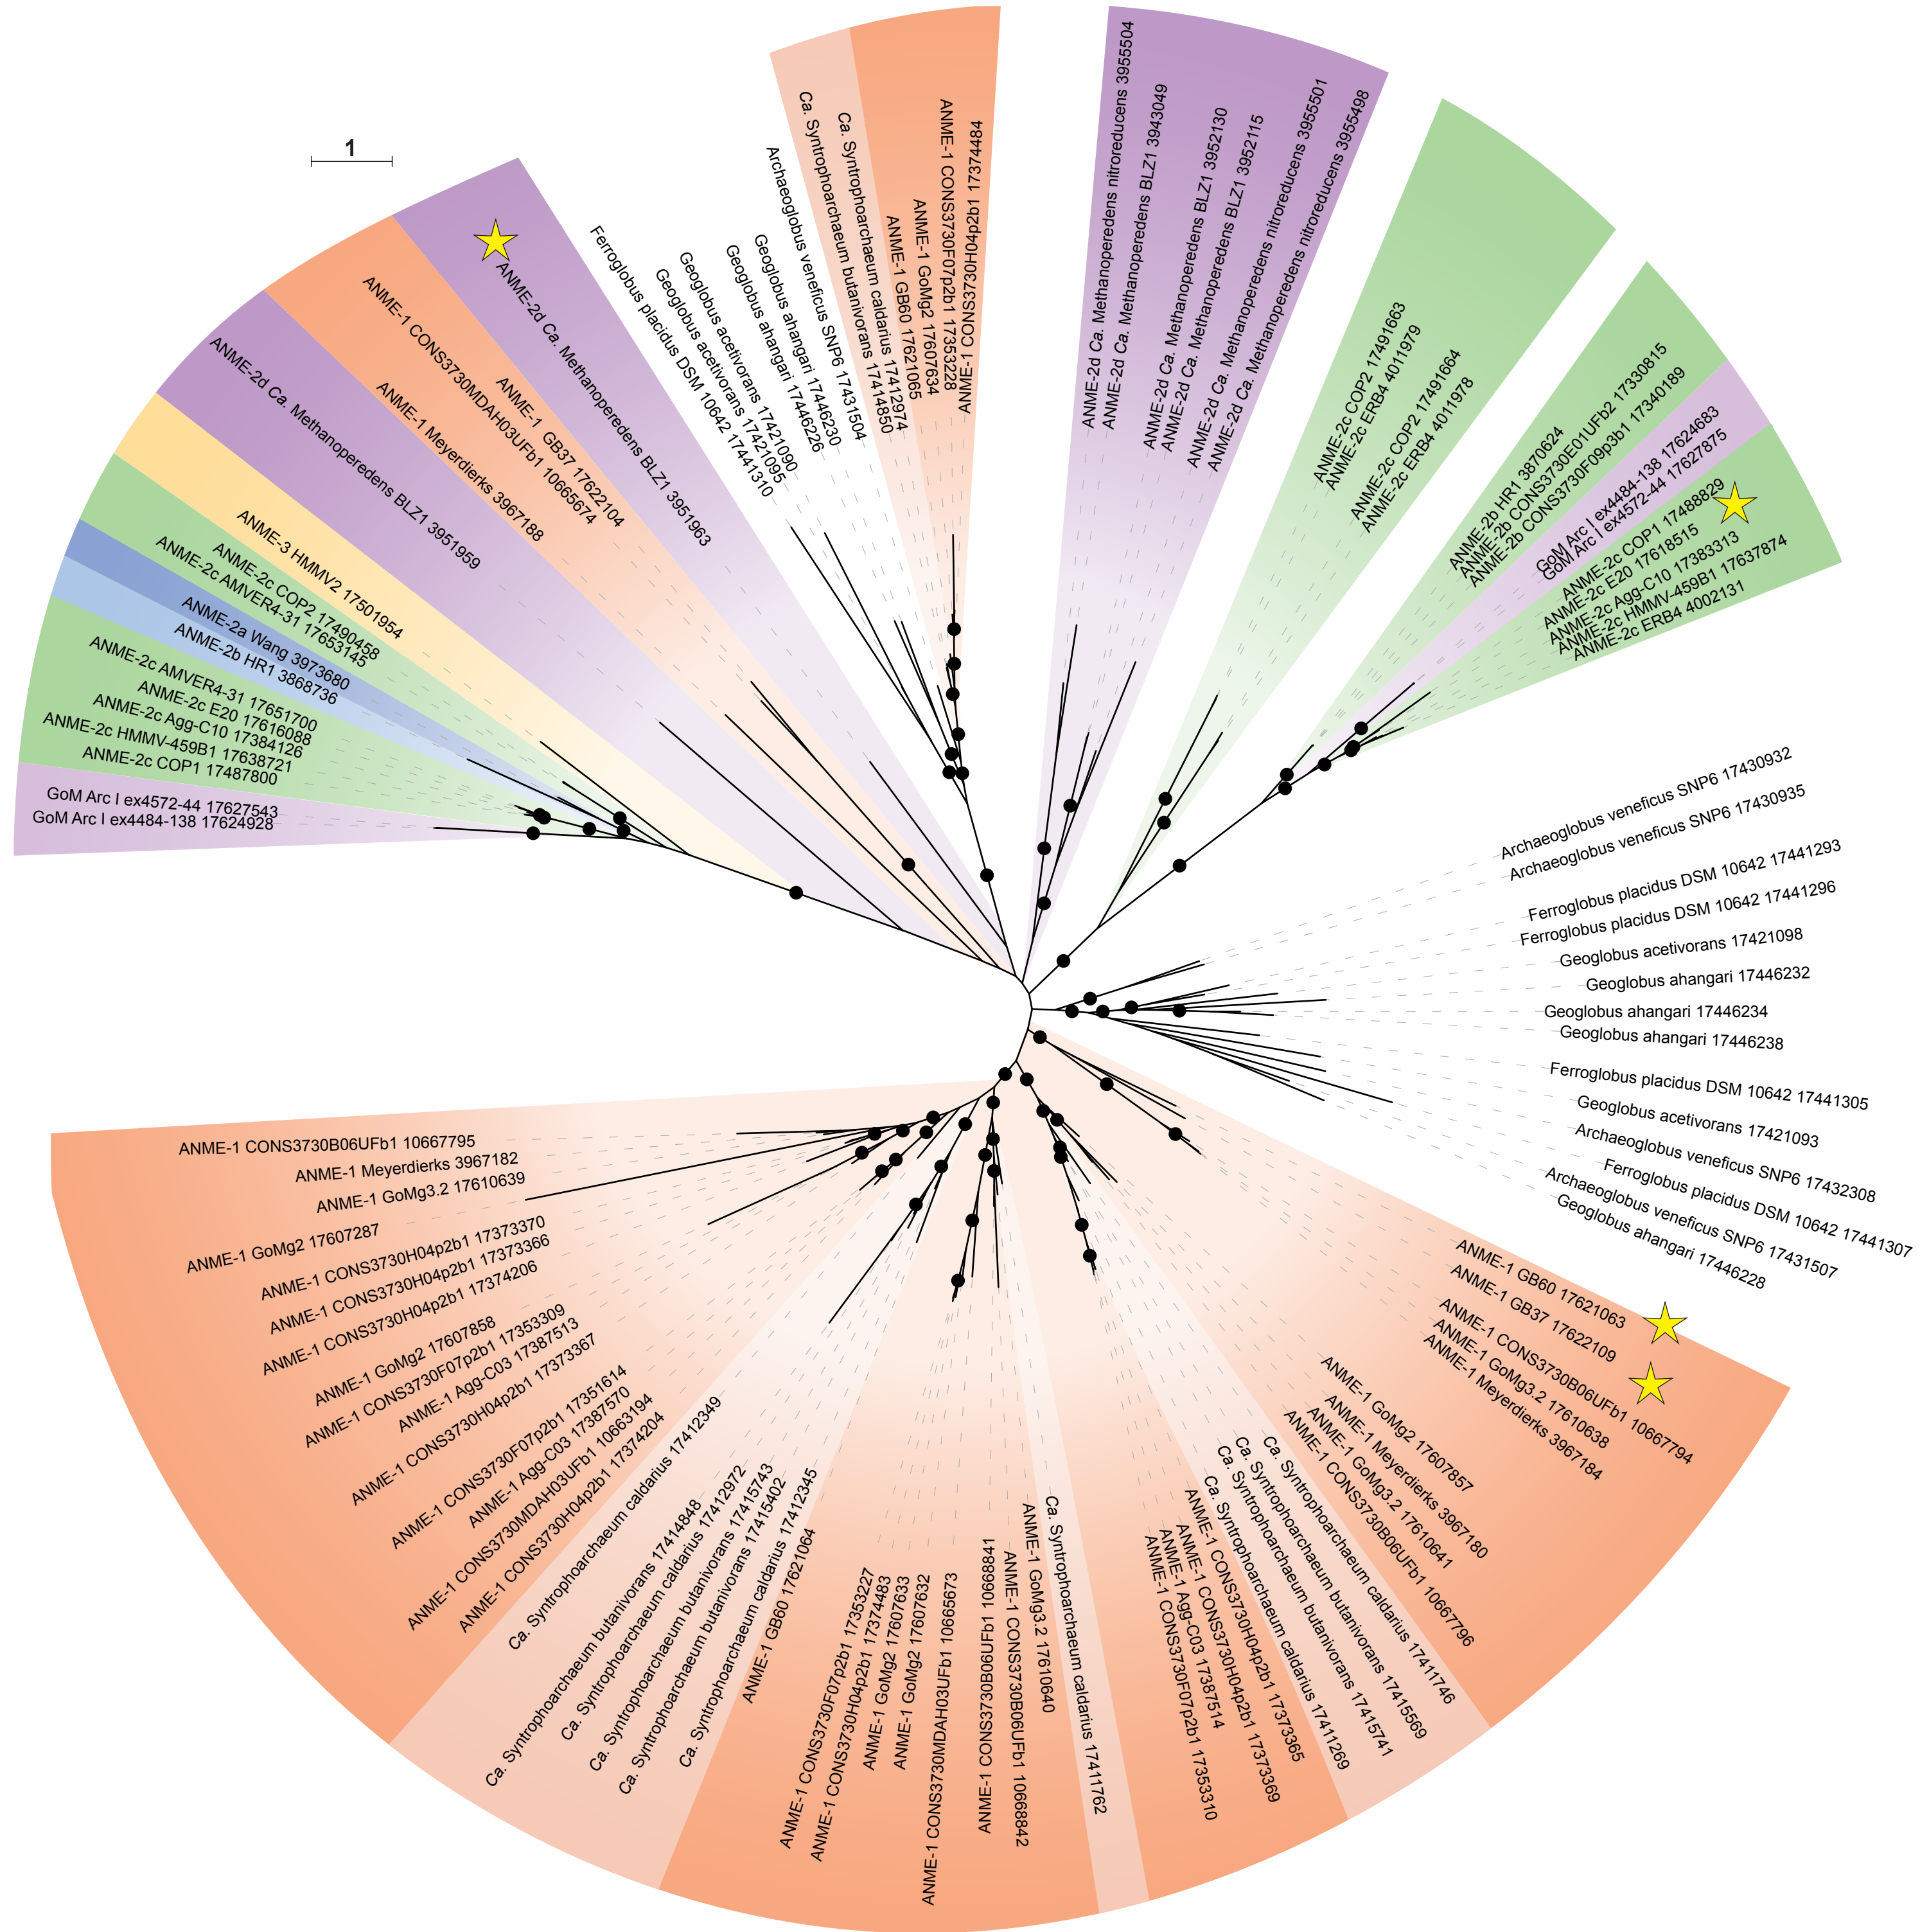

Supplement: S14 (10.1371/journal.pbio.3001508.s014) [file journal.pbio.3001508.s014.ai]
